# Supplementary material for: Rapid Eye Movements during REM Sleep Differentiate PSP from Parkinson's Disease
Source: PubMed Central journal article supplement (PMC11489613; doi:10.1002/mdc3.14187), 2024-08-07

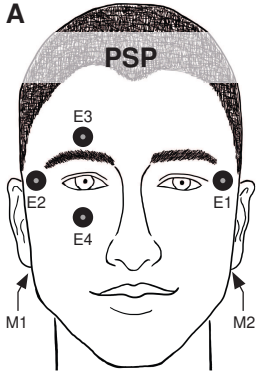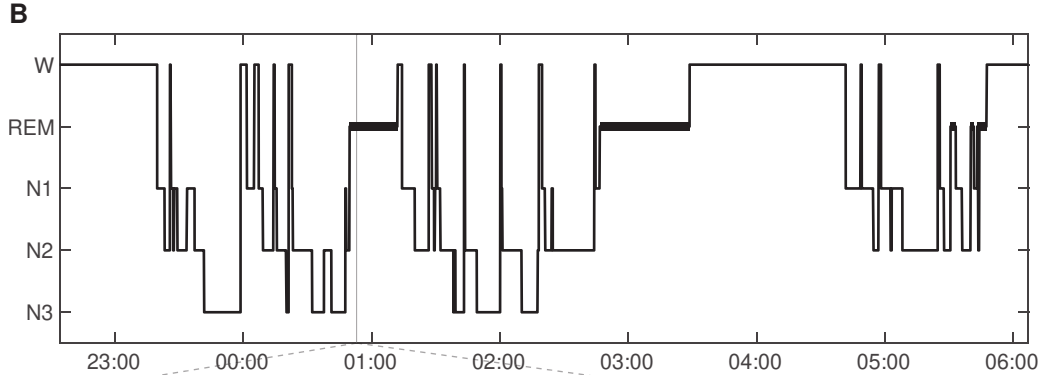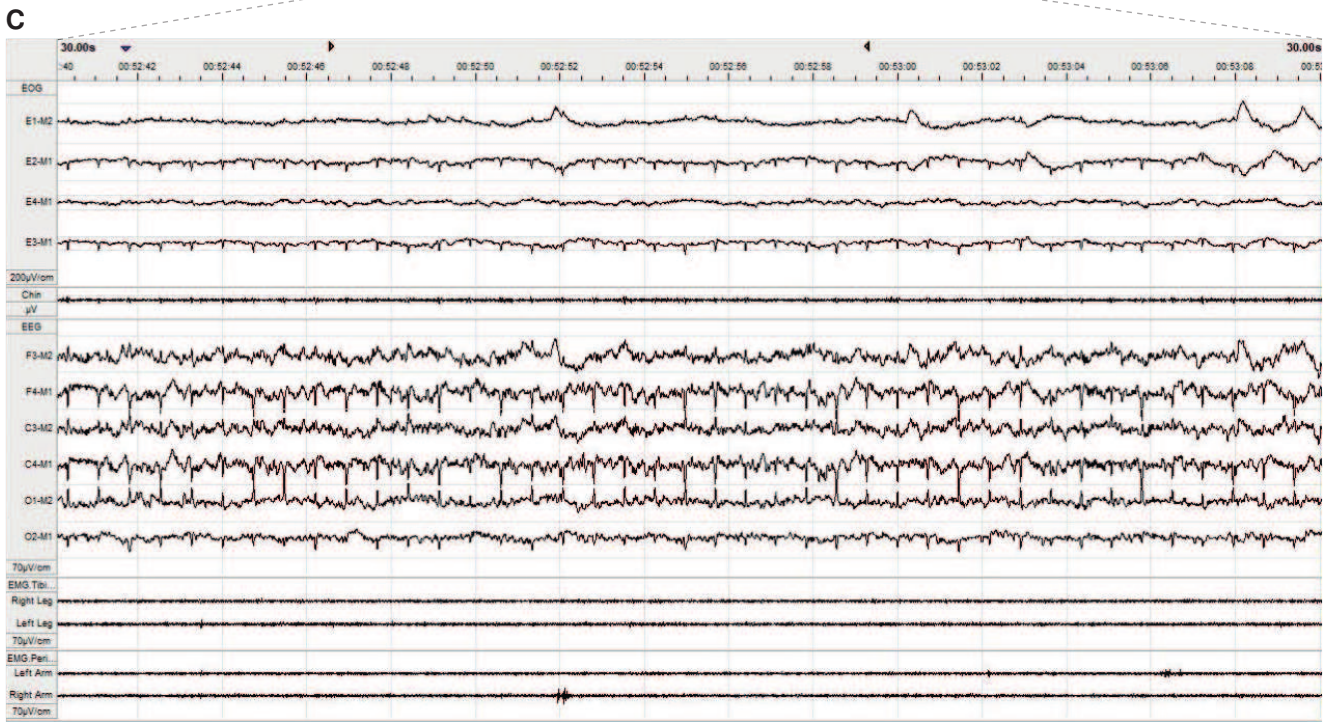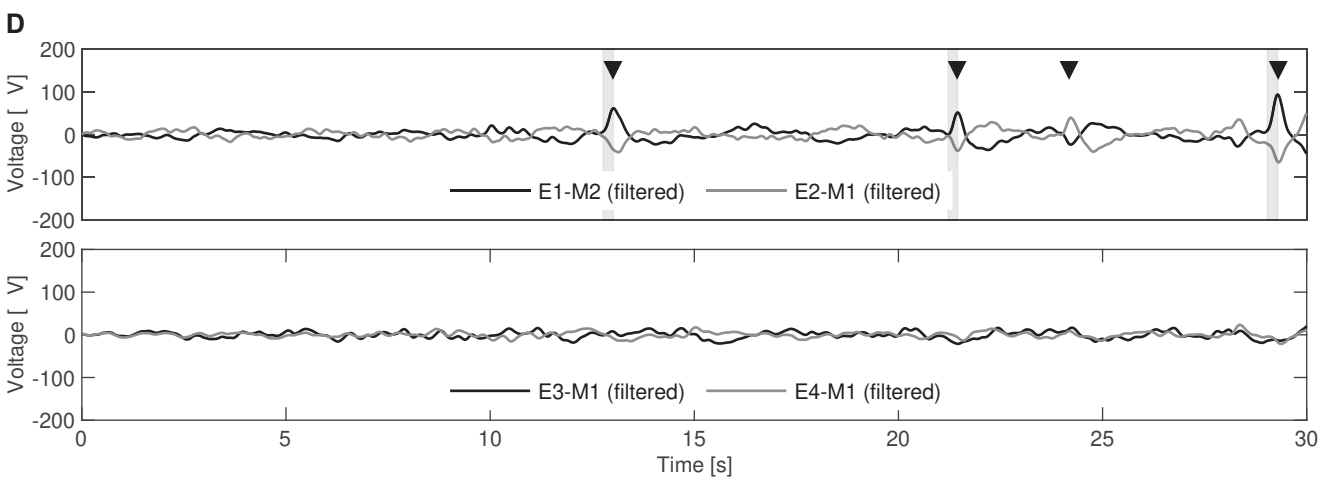

Supplement: MDC3-11-1281-s005.pdf [file MDC3-11-1281-s005.pdf]
